# Supplementary material
Source: Elsevier journal article supplement (https://www.sciencedirect.com/science/article/pii/S1665268120300806)
Supplement: mmc1 [file S1665268120300806:mmc1.docx]

**SUPPLEMENTARY DATA**

**Title**

Differential capacity of CD90+ cells in autophagy activation following chemotherapy in hepatocellular carcinoma

**Table S1.** List of primers

| Gene | Acc. No. | Sequence F (5’ → 3’) | Sequence R (5’ → 3’) |
| --- | --- | --- | --- |
| 18SRNA | NR_003286 | TAACCCGTTGAACCCCATT | CCATCCAATCGGTAGTAGCG |
| ACTB | NM_001101 | CGCCGCCAGCTCACCATG | CACGATGGAGGGGAAGACGG |
| CD90 | NM_006288 | AGAGACTTGGATGAGGAG | CTGAGAATGCTGGAGATG |
| ATG8 | NM_031412 | ACGCCTTATTCTTCTTTG | AACCACTCATTTCCCATA |
| ATG18 | NM_017983 | GAGAAGTTATTCCTGAACAT | CACGGCACAAGATTATAG |
| ATG6 | NM_001313998 | ACCGTGCACCATCCAGGAA | GAAGCTGTTGGCACTTTCTGT |
| REDD1 | NM_019058.2 | GTGGAGGTGGTTTGTGTA | CAGGTCAGTAGTGATGCT |
| HGF | NM_001010932 | AAGGTCAAGGAGAAGGCTACAG | TGCTCGTGAGGATACTGAGAATC |
| AXIN2 | NM_004655.3 | GAATGAAGAAGAGGAGTG | TCTTGAAGGACCTGTATC |

**Figure S1.** mRNA expression of autophagy marker ATG6/Beclin-1. mRNA expression was normalized to two reference genes ACTB and 18sRNA. The expression of a normal sample was considered as 1.0. SNT = surrounding non-tumor; HCC = HCC nodule.


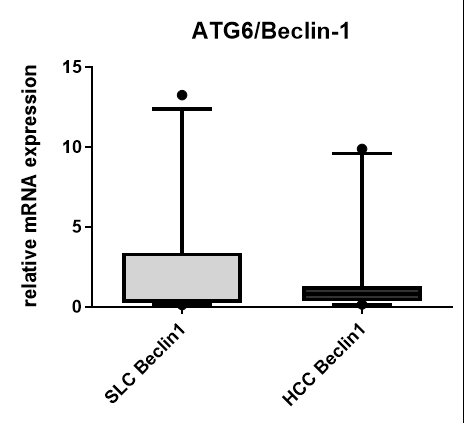


**HCC**

**SNT**
